# Supplementary material for: Brazilian recommendations of mechanical ventilation 2013. Part I
Source: PubMed Central journal article supplement (PMC4201165; doi:10.1590/s1806-37132014000400002), 2014
Supplement: 1806-3713-jbpneu-40-04-00327-suppl01-pt.pdf [file 1806-3713-jbpneu-40-04-00327-suppl01-pt.pdf]

## Recomendações brasileiras de ventilação mecânica 2013. Parte 1

*Brazilian recommendations of mechanical ventilation 2013. Part 1*

Grupo de trabalho AMIB e SBPT

**Quadro 1** – Ventiladores disponíveis para realização de ventilação não invasiva.

| Fabricante/<br>Modelo                                                                             | Contexto<br>de utilização              | Modos disponíveis                                                                                | Modos especiais                                                                                              | Observações                                                                        |
|---------------------------------------------------------------------------------------------------|----------------------------------------|--------------------------------------------------------------------------------------------------|--------------------------------------------------------------------------------------------------------------|------------------------------------------------------------------------------------|
| <b>Philips</b>                                                                                    |                                        |                                                                                                  |                                                                                                              |                                                                                    |
| BIPAP A30                                                                                         | Especial para VNI                      | AVAPS<br><i>Auto-trak</i>                                                                        | Acoplamento de oximetria                                                                                     | Pode acoplar cartão de memória e tendências                                        |
| TRILOGY-100                                                                                       | VNI e VMI                              | PSV, PCV e VCV<br>AVAPS                                                                          | Compensação de fugas<br><i>Auto-trak</i><br>Umidificação aquecida                                            | Tela de monitorização<br>Bateria de 6 a 8 horas                                    |
| <b>Dixtal</b>                                                                                     |                                        |                                                                                                  |                                                                                                              |                                                                                    |
| DX3012                                                                                            | VNI e VMI                              | PSV, PCV,<br>VCV, SIMV, CPAP                                                                     | Compensação de fugas<br>Umidificação ativa e passiva                                                         | Tela de monitorização,<br>capnografia volumétrica                                  |
| <b>Philips respironics</b>                                                                        |                                        |                                                                                                  |                                                                                                              |                                                                                    |
| BIPAP-vision,<br>focus e ST                                                                       | Especiais para não<br>invasiva         | BIPAP e CPAP                                                                                     | <i>Auto-trak</i><br>Compensação de fugas<br>Ajuste de rampa<br>Controle de FIO <sub>2</sub> <i>no vision</i> | Tela de monitorização                                                              |
| <b>Resmed</b>                                                                                     |                                        |                                                                                                  |                                                                                                              |                                                                                    |
| Stellar                                                                                           | VNI e VMI                              | PSV com ajuste<br>automático de pressão<br>iVAPS                                                 | Controle de FIO <sub>2</sub><br>Portátil<br><i>Download</i> de dados                                         | Tela de monitorização, valores<br>predefinidos para doenças,<br>ajuste de máscaras |
| <b>Covidien</b>                                                                                   |                                        |                                                                                                  |                                                                                                              |                                                                                    |
| Covidien 840                                                                                      | Módulo de VNI                          | Espontâneo + PSV<br>A/C e SIMV                                                                   | Possibilidade de ajuste de rampa e<br>sensibilidade expiratória na PSV                                       | Possibilidade de <i>back up</i> com<br>ventilação manual e ou f                    |
| <b>Servo</b>                                                                                      |                                        |                                                                                                  |                                                                                                              |                                                                                    |
| Servo I                                                                                           | Módulo de VNI                          | Espontâneo e PSV                                                                                 | Controle de FIO <sub>2</sub><br>Ajuste de rampa e ciclagem<br>expiratória                                    | Tela de monitorização                                                              |
| <b>Drager</b>                                                                                     |                                        |                                                                                                  |                                                                                                              |                                                                                    |
| Ventilador Carina                                                                                 | Especial para VNI                      | VC-SIMV <i>Auto-Flow</i><br>PC-BIPAP<br>PC-AC<br>SPN-PS (VG)<br>SPN-CPAP<br>Ventilação de apneia | Bateria interna de 1 hora e externa<br>de 9 horas<br>Disparo e controle de rampa<br>automáticos              | Tela de monitorização e<br>compensação automática de<br>fugas                      |
| EVITA XL                                                                                          | Modulo especial<br>para não invasiva   | PSV                                                                                              | Ajustes automáticos                                                                                          | Tela de monitorização                                                              |
| <b>GE</b>                                                                                         |                                        |                                                                                                  |                                                                                                              |                                                                                    |
| Engstron Pro                                                                                      | VNI e VMI                              | Multiplos modos<br>ventilatórios                                                                 | Bateria interna                                                                                              | Tela de monitorização e ajustes<br>automáticos                                     |
| <b>Ventilador Alliance</b>                                                                        |                                        |                                                                                                  |                                                                                                              |                                                                                    |
| Care fusion-VELA                                                                                  | Modulo específico<br>para não invasiva | PSV                                                                                              | Bateria para 6 horas<br>Compensação de vazamentos                                                            | Tela de monitorização                                                              |
| <b>Intermed</b>                                                                                   |                                        |                                                                                                  |                                                                                                              |                                                                                    |
| Care Fusion: IX-5                                                                                 | Modulo específico<br>para não invasiva | A/C, SIMV, CPAP, PSV                                                                             | Ajuste de sensibilidade inspiratória,<br>expiratória e <i>rise time</i>                                      | Tela de monitorização com até<br>5 curvas simultâneas                              |
| Care Fusion: Inter<br>7 plus                                                                      | Modulo específico<br>para não invasiva | A/C, SIMV, CPAP, PSV                                                                             | Ajuste de sensibilidade inspiratória,<br>expiratória e <i>rise time</i>                                      | Bateria interna com até 3 horas                                                    |
| <b>Ventilador - VIVO</b>                                                                          |                                        |                                                                                                  |                                                                                                              |                                                                                    |
| VIVO 40 (pressão<br>até 40cmH <sub>2</sub> O) e<br>VIVO 30 (pressões<br>até 30cmH <sub>2</sub> O) | Especial para não<br>invasiva          | PSV, PCV e CPAP                                                                                  | Ajuste de sensibilidade inspiratória<br>e expiratória, ajuste de <i>rise time</i>                            | Bateria externa<br>Sistema de umidificação                                         |

**Quadro 1 - Continuação...**

| Fabricante/<br>Modelo                                | Contexto<br>de utilização     | Modos disponíveis | Modos especiais                              | Observações           |
|------------------------------------------------------|-------------------------------|-------------------|----------------------------------------------|-----------------------|
| <b>Breas</b>                                         |                               |                   |                                              |                       |
| l-sleep 20<br>(pressões até<br>20cmH <sub>2</sub> O) | Especial para não<br>invasiva | CPAP              | Rampa ajustável<br>Compensação de vazamentos | Umidificador aquecido |

BIPAP - *bilevel positive air pressure*; VNI - ventilação não invasiva; AVAPS - *average volume assured pressure support*; VMI - ventilação mecânica invasiva; PSV - *pressure support ventilation mode*; VCV - *volume controlled ventilation mode*; PCV - *pressure controlled ventilation mode*; SIMV - *synchronized inspiratory mandatory ventilation*; CPAP - *continuous positive air pressure*; iVAPS - *intelligent volume-assured pressure support*; FIO<sub>2</sub> - fração inspirada de oxigênio; f - frequência respiratória; SPN-PS (VG) - *spontaneous - pressure support (volume guarantee)*; SPN - *spontaneous - pressure support*; A/C - assistido/controlado.

**Quadro 2 - Ventiladores básicos (sem monitorização de curvas).**

| Fabricante/Modelo                                     | Faixa<br>etária | Contexto<br>de utilização | Modos disponíveis                              | Fluxo (VCV)               | Modos<br>especiais                      | Observações                                             |
|-------------------------------------------------------|-----------------|---------------------------|------------------------------------------------|---------------------------|-----------------------------------------|---------------------------------------------------------|
| <b>Air Liquide</b>                                    |                 |                           |                                                |                           |                                         |                                                         |
| Taema Osiris                                          | Ad, Ped         | Transporte                | A-C (VCV)                                      | Contínuo                  | ---                                     | ---                                                     |
| <b>Bio-Ventw</b>                                      |                 |                           |                                                |                           |                                         |                                                         |
| CrossVent CV-3 / CV-4                                 | Ad, Ped         | UTI,<br>Transporte        | A-C (VCV), SIMV, CPAP/<br>espontâneo, PSV      | Contínuo                  | ---                                     | ---                                                     |
| <b>Care Fusion</b>                                    |                 |                           |                                                |                           |                                         |                                                         |
| Omni-Tech Omni-Vent                                   | Ad, Ped         | Transporte                | A-C (VCV)                                      |                           | ---                                     | Permite uso em RNM<br>Permite ventilação<br>hiperbárica |
| Allied EPV 200                                        | Ad              | Transporte                | A-C (VCV)                                      | Contínuo                  | ---                                     | ---                                                     |
| Allied Life Support<br>Autovent 2000, 3000<br>Et 4000 | Ad              | Transporte                | A-C (VCV), CPAP/espontâneo                     | Contínuo                  | ---                                     | ---                                                     |
| <b>Drager</b>                                         |                 |                           |                                                |                           |                                         |                                                         |
| Oxylog 2000 Plus                                      | Ad              | Transporte                | A-C (VCV), SIMV, CPAP/<br>espontâneo           | Contínuo                  | ---                                     | ---                                                     |
| Oxylog 3000                                           | Ad, Ped         | Transporte                | A-C (VCV), PCV, SIMV, CPAP/<br>espontâneo, PSV | Contínuo                  | ---                                     | ---                                                     |
| Oxylog 3000                                           | Ad, Ped         | Transporte                | A-C (VCV), PCV, SIMV, CPAP/<br>espontâneo, PSV | Contínuo                  | ---                                     | Capnometria.<br>Opcional: <i>autoflow</i>               |
| <b>GE</b>                                             |                 |                           |                                                |                           |                                         |                                                         |
| Bi-Level 40                                           | Ad, Ped         | Transporte                | A-C (VCV), PCV, SIMV, CPAP/<br>espontâneo, PSV | Contínuo                  | ---                                     | ---                                                     |
| <b>K. Takaoka</b>                                     |                 |                           |                                                |                           |                                         |                                                         |
| Mini-ventil 600                                       | Ad              | Transporte                | A-C (VCV)                                      | Contínuo                  | ---                                     | ---                                                     |
| MicroTak 920                                          | Ad, Ped         | Transporte                | A-C (VCV), SIMV, CPAP/<br>espontâneo           | Contínuo                  | ---                                     | ---                                                     |
| <b>Leistung</b>                                       |                 |                           |                                                |                           |                                         |                                                         |
| PR 4D-02                                              | Ad, Ped         | Transporte                | A-C (VCV)                                      | Contínuo                  | ---                                     | Ciclado a tempo                                         |
| <b>Res Med</b>                                        |                 |                           |                                                |                           |                                         |                                                         |
| VS III                                                | Ad, Ped         | UTI, VNI                  | A-C (VCV), PCV, SIMV, CPAP/<br>espontâneo, PSV | Contínuo                  | ---                                     | ---                                                     |
| <b>Tyco / Covidien</b>                                |                 |                           |                                                |                           |                                         |                                                         |
| Newport HT 70                                         | Ad, Ped         | Transporte                | A-C (VCV), PCV, SIMV, CPAP/<br>espontâneo, PSV | Contínuo,<br>Desacelerado | Rise time<br>% tempo<br>expiratório-PSV | ---                                                     |
| <b>Vent-Logos</b>                                     |                 |                           |                                                |                           |                                         |                                                         |
| VLP 2000 - E                                          | Ad              | Transporte                | A-C (VCV)                                      | Contínuo                  | ---                                     | ---                                                     |
| VLP 4000 - P                                          | Ad              | Transporte                | A-C (VCV)                                      | Contínuo                  | ---                                     | ---                                                     |

Ad - uso em adultos; Ped - uso em crianças (não neonatos); A-C - assistido controlado; VCV - *volume controlled ventilation mode*; SIMV - *synchronized inspiratory mandatory ventilation*; CPAP - *continuous positive air pressure*; PCV - *pressure controlled ventilation mode*; PSV - *pressure support ventilation mode*; RNM - ressonância nuclear magnética; transporte - uso em transporte do paciente sob ventilação mecânica invasiva; UTI - uso apropriado para unidade de terapia intensiva; VNI - uso para ventilação não invasiva.

**Quadro 3** – Ventiladores com recursos básicos, com curvas.

| Fabricante/<br>Modelo | Faixa<br>etária | Contexto<br>de utilização | Modos disponíveis                          | Fluxo<br>(VCV)         | Monitoramento | Modos<br>especiais                                                     | Observações                                                                                  |
|-----------------------|-----------------|---------------------------|--------------------------------------------|------------------------|---------------|------------------------------------------------------------------------|----------------------------------------------------------------------------------------------|
| <b>Air Liquide</b>    |                 |                           |                                            |                        |               |                                                                        |                                                                                              |
| Extend XT             | Ad, Neo         | UTI                       | A-C (VCV), PCV, SIMV, CPAP/Espontâneo, PSV | Contínuo, Desacelerado | Curvas, Alças | - - -                                                                  | Capnógrafo                                                                                   |
| <b>Care Fusion</b>    |                 |                           |                                            |                        |               |                                                                        |                                                                                              |
| Intermed Inter-5 Plus | Ad, Ped         | UTI                       | A-C (VCV), PCV, SIMV, CPAP/Espontâneo, PSV | Contínuo, Desacelerado | Curvas        | - - -                                                                  | Monitor em separado                                                                          |
| <b>Dräger</b>         |                 |                           |                                            |                        |               |                                                                        |                                                                                              |
| Savina 300            | Ad, Ped         | UTI                       | A-C (VCV), PCV, SIMV, CPAP/Espontâneo, PSV | Contínuo, Desacelerado | Curvas        | BiLevel                                                                | <i>Auto-Flow</i>                                                                             |
| <b>GE</b>             |                 |                           |                                            |                        |               |                                                                        |                                                                                              |
| Ventil Pulmonar 101   | Ad, Ped         | UTI, Domicílio            | A-C (VCV), PCV, SIMV, CPAP/Espontâneo, PSV | Contínuo, Desacelerado | Curvas        | PRVC, Vol garantido                                                    | iVent MRI: pode ser utilizado para RNM                                                       |
| <b>Hamilton</b>       |                 |                           |                                            |                        |               |                                                                        |                                                                                              |
| Galileo Gold          | Ad, Ped         | UTI                       | A-C (VCV), PCV, SIMV, CPAP/Espontâneo, PSV | Contínuo, Desacelerado | Curvas, Alças | ASV, APRV, Compensação automática tubo                                 | Curva P-V automática, P0.1                                                                   |
| Raphael Color         | Ad, Ped         | UTI, PS                   | A-C (VCV), PCV, SIMV, CPAP/Espontâneo, PSV | Contínuo, Desacelerado | Curvas, Alças | ASV, APRV, Compensação automática tubo                                 | - - -                                                                                        |
| T-1                   | Ad, Ped         | Transporte                | A-C (VCV), PCV, SIMV, CPAP/Espontâneo, PSV | Contínuo, Desacelerado | Curvas        | ASV                                                                    | Curva P-V automática<br>Capnometria<br>Compensação de pressão barométrica (transporte aéreo) |
| MR-1                  | Ad, Ped         | Transporte                | A-C (VCV), PCV, SIMV, CPAP/Espontâneo, PSV | Contínuo, Desacelerado | Curvas        | ASV                                                                    | Para RNM Monitor "extra"                                                                     |
| <b>K-Takaoka</b>      |                 |                           |                                            |                        |               |                                                                        |                                                                                              |
| Smart                 | Ad, Neo         | UTI, PS                   | A-C (VCV), PCV, SIMV, CPAP/Espontâneo, PSV | Contínuo, Desacelerado | Curvas, Alças | BiLevel, Compens TOT                                                   | P0.1<br>PiMax                                                                                |
| Carmel                | Ad, Neo         | UTI                       | A-C (VCV), PCV, SIMV, CPAP/Espontâneo, PSV | Contínuo, Desacelerado | Curvas        | PSV: <i>Rise Time</i> & Ajuste de tempo (%Fluxo), PCV-volume garantido | Capnometria                                                                                  |
| <b>Leistung</b>       |                 |                           |                                            |                        |               |                                                                        |                                                                                              |
| Luft 1-g              | Ad, Ped         | UTI, PS                   | A-C (VCV), PCV, SIMV, CPAP/Espontâneo, PSV | Contínuo, Desacelerado | Curvas        | - - -                                                                  | - - -                                                                                        |
| Luft 2-g              | Ad, Ped         | UTI                       | A-C (VCV), PCV, SIMV, CPAP/Espontâneo, PSV | Contínuo, Desacelerado | Curvas, Alças | MMV, BiLevel, PSV-volume garantido, APRV                               | - - -                                                                                        |
| PR - 4g               | Ad, Ped         | Transporte                | A-C (VCV), PCV, SIMV, CPAP/Espontâneo, PSV | Contínuo, Desacelerado | Curvas        | - - -                                                                  | - - -                                                                                        |
| <b>Magnamed</b>       |                 |                           |                                            |                        |               |                                                                        |                                                                                              |
| Fleximag              | Ad, Neo         | UTI, PS                   | A-C (VCV), PCV, SIMV, CPAP/Espontâneo, PSV | Contínuo, Desacelerado | Curvas        | BiLevel, PSV: <i>rise time</i>                                         | Capnógrafo (opcional)                                                                        |
| Oxymag                | Ad, Neo         | Transporte                | A-C (VCV), PCV, SIMV, CPAP/Espontâneo, PSV | Contínuo, Desacelerado | Curvas        | BiLevel, APRV                                                          | Capnógrafo (opcional)                                                                        |
| <b>Neumovent</b>      |                 |                           |                                            |                        |               |                                                                        |                                                                                              |
| GraphNet T5           | Ad, Ped         | UTI, PS                   | A-C (VCV), PCV, SIMV, CPAP/Espontâneo, PSV | Contínuo, Desacelerado | Curvas        | - - -                                                                  | - - -                                                                                        |
| <b>Tyco/Covidien</b>  |                 |                           |                                            |                        |               |                                                                        |                                                                                              |
| Newport e360          | Ad              | UTI, PS                   | A-C (VCV), PCV, SIMV, CPAP/Espontâneo, PSV | Contínuo, Desacelerado | Curvas, Alças | BiLevel, PSV: <i>rise time</i> & Ajuste tempo (%Fluxo), APRV           | - - -                                                                                        |

Ad - uso em adultos; Ped - uso em crianças (não neonatos); Neo - uso em neonatologia; UTI = uso apropriado para UTI; PSV - *pressure support ventilation mode*; VCV - *volume controlled ventilation mode*; PCV - *pressure controlled ventilation mode*; SIMV - *synchronized inspiratory mandatory ventilation*; CPAP - *continuous positive air pressure*; APRV - *airway pressure release ventilation*; PRVC - *pressure regulated volume controlled*; ASV - *adaptive support ventilation*; MMV - *minute mandatory ventilation*; PS - uso no pronto-socorro.

**Quadro 4** – Ventiladores com monitorização de curvas e recursos avançados.

| Fabricante/<br>Modelo    | Faixa<br>etária | Contexto<br>de utilização | Modos<br>básicos | Fluxo<br>(VCV)            | Monitoramento | Modos especiais                                                                                                                                                 | Observações                                                           |
|--------------------------|-----------------|---------------------------|------------------|---------------------------|---------------|-----------------------------------------------------------------------------------------------------------------------------------------------------------------|-----------------------------------------------------------------------|
| <b>Air Liquide</b>       |                 |                           |                  |                           |               |                                                                                                                                                                 |                                                                       |
| Monnal<br>T-75           | Ad, Neo         | UTI                       | Sim              | Contínuo,<br>Desacelerado | Curvas, Alças | BiLevel CPAP,<br>PRVC                                                                                                                                           | Possui capnógrafo                                                     |
| <b>Care Fusion</b>       |                 |                           |                  |                           |               |                                                                                                                                                                 |                                                                       |
| Viasys Vela              | Ad, Ped         | UTI                       | Sim              | Contínuo,<br>Desacelerado | Curvas, Alças | PSV: <i>rise time</i> Et ajuste<br>tempo (% Fluxo), PRVC,<br>APRV                                                                                               | Capnógrafo                                                            |
| Viasys Avea              | Ad, Neo         | UTI                       | Sim              | Contínuo,<br>Desacelerado | Curvas, Alças | V-PSV,<br>PSV: <i>RiseTime</i> Et Ajuste<br>tempo (% Fluxo), Vsinc,<br>PRVC, AAC (Compens tubo)                                                                 | Capnógrafo<br>Mede P0.1, Pimax, WOB<br>(esofágica)                    |
| Intermed<br>i X5         | Ad, Neo         | UTI                       | Sim              | Contínuo,<br>Desacelerado | Curvas, Alças | PSV: <i>RiseTime</i> Et Ajuste<br>tempo (% Fluxo), TGI,<br>Compens tubo                                                                                         | Mede P0.1                                                             |
| Intermed<br>Inter-7 Plus | Ad, Neo         | UTI                       | Sim              | Contínuo,<br>Desacelerado | Curvas, Alças | PSV: <i>RiseTime</i> Et Ajuste<br>tempo (% Fluxo), VAPS,<br>BiLevel, TGI,<br>APRV (BiPEEP)                                                                      | Mede P0.1                                                             |
| <b>Drager</b>            |                 |                           |                  |                           |               |                                                                                                                                                                 |                                                                       |
| Evita 4                  | Ad, Ped         | UTI                       | Sim              | Contínuo,<br>Desacelerado | Curvas, Alças | MMV, <i>Auto-Flow</i> , APRV,<br>PPS (opcional), ATC -<br>Compens tubo                                                                                          | Capnógrafo, PiMax,<br>Vd/Vt                                           |
| Evita XL                 | Ad, Neo         | UTI                       | Sim              | Contínuo,<br>Desacelerado | Curvas, Alças | <i>Auto-Flow</i> , Compensação<br>automatica de tubo,<br><i>Smart Care</i><br>PS variável, BiLevel,<br>PC-APRV,<br>Manobra recrutamento,<br>Manobra fluxo baixo | Capnógrafo, Oxímetro,<br><i>Lung protection package</i><br>(opcional) |
| <b>GE</b>                |                 |                           |                  |                           |               |                                                                                                                                                                 |                                                                       |
| Engstron<br>Carestation  | Ad, Neo         | UTI                       | Sim              | Contínuo,<br>Desacelerado | Curvas, Alças | BiLevel<br>PSV: <i>RiseTime</i> Et Ajuste<br>tempo (% Fluxo),<br>Compensação automática<br>de tubo, APRV,<br>PC-Volume garantido                                | P0.1, PiMax, Mede CRF,<br>Calorimetria indireta                       |
| Engstron<br>Pro          | Ad, Neo         | UTI                       | Sim              | Contínuo,<br>Desacelerado | Curvas, Alças | BiLevel,<br>PSV: <i>RiseTime</i> Et Ajuste<br>tempo (% Fluxo),<br>Compensação automática<br>de TOT, APRV,<br>PC-volume garantido                                | P0.1                                                                  |
| <b>Hamilton</b>          |                 |                           |                  |                           |               |                                                                                                                                                                 |                                                                       |
| C-3                      | Ad, Ped         | UTI, PS                   | Sim              | Contínuo,<br>Desacelerado | Curvas        | ASV, APRV                                                                                                                                                       | Capnometria volumétrica<br>(opcional),                                |
| C-2                      | Ad, Ped         | UTI, PS                   | Sim              | Contínuo,<br>Desacelerado | Curvas, Alças | ASV, APV,<br>Compensação do tubo,<br>APRV                                                                                                                       | Curva P-V automática,<br>Capnografia volumétrica<br>(opcional),       |
| S-1                      | Ad, Ped         | UTI                       | Sim              | Contínuo,<br>Desacelerado | Curvas, Alças | ASV, APRV                                                                                                                                                       | Curva P-V automática,<br>Capnógrafo,                                  |
| G-5                      | Ad, Neo         | UTI                       | Sim              | Contínuo,<br>Desacelerado | Curvas, Alças | ASV, BiLevel, APRV, APV                                                                                                                                         | Permite Heliox (opcional),<br>Capnografia volumétrica<br>(opcional)   |
| <b>K Takaoka</b>         |                 |                           |                  |                           |               |                                                                                                                                                                 |                                                                       |
| Color                    | Ad, Neo         | UTI                       | Sim              | Contínuo,<br>Desacelerado | Curvas        | MMV, PSV-Volume<br>garantido,<br>BiLevel,<br>Compensação do tubo                                                                                                | P0.1, PiMax,<br>Capnometria                                           |

**Quadro 4** – Continuação...

| Fabricante/ Modelo    | Faixa etária | Contexto de utilização | Modos básicos | Fluxo (VCV)            | Monitoramento | Modos especiais                                                                                                                        | Observações                                                                                                                                                                                      |
|-----------------------|--------------|------------------------|---------------|------------------------|---------------|----------------------------------------------------------------------------------------------------------------------------------------|--------------------------------------------------------------------------------------------------------------------------------------------------------------------------------------------------|
| <b>Maquet Getinge</b> |              |                        |               |                        |               |                                                                                                                                        |                                                                                                                                                                                                  |
| Servo-i               | Ad, Ped      | UTI                    | Sim           | Contínuo, Desacelerado | Curvas, Alças | NAVA (opcional), AutoMode, BiLevel, PSV: <i>RiseTime</i> Et Ajuste tempo (% Fluxo), PRVC, APRV                                         | Capnógrafo, PO.1, WOB ( <i>in-line</i> )                                                                                                                                                         |
| Servo-S               | Ad, Ped      | UTI                    | Sim           | Contínuo, Desacelerado | Curvas, Alças | BiLevel, PSV: <i>RiseTime</i> Et Ajuste tempo (% Fluxo), PRVC, APRV                                                                    | PO.1                                                                                                                                                                                             |
| <b>Mindray</b>        |              |                        |               |                        |               |                                                                                                                                        |                                                                                                                                                                                                  |
| Synovent E3           | Ad, Ped      | Hospital, UTI, PS      | Sim           | Contínuo, Desacelerado | Curvas, Alças | Bilevel, PSV, opção de controle de trigger expiratório automático, <i>rise time</i> , ajuste de tempo, compensação de tubo             | Capnógrafo, PO.1, Trabalho respiratório, PiMax, permite conectividade com sistema hospitalar (Bnelink/HL7)                                                                                       |
| Synovent E5           | Ad, Ped      | UTI                    | Sim           | Contínuo, Desacelerado | Curvas, Alças | PRVC, APRV, Bilevel, PSV, opção de controle de trigger expiratório automático, <i>rise time</i> , ajuste de tempo, compensação de tubo | Capnógrafo, PO.1, Trabalho respiratório, PiMax, manobra de baixo fluxo permite conectividade com sistema hospitalar (Bnelink/HL7), exibe quatro curvas simultâneas (PxT, VxT, FxT e capnografia) |
| <b>Neumovent</b>      |              |                        |               |                        |               |                                                                                                                                        |                                                                                                                                                                                                  |
| GraphNet Advance      | Ad, Neo      | UTI                    | Sim           | Contínuo, Desacelerado | Curvas, Alças | PRVC, APRV                                                                                                                             | Capnógrafo                                                                                                                                                                                       |
| <b>Philips</b>        |              |                        |               |                        |               |                                                                                                                                        |                                                                                                                                                                                                  |
| Dixtal DX-3012 Plus   | Ad, Ped      | UTI                    | Sim           | Contínuo, Desacelerado | Curvas, Alças | BiLevel, PS-Vol Gar, MMV, PSV: <i>rise time</i> Et ajuste tempo (% fluxo), APRV                                                        | PO.1, Capnógrafo                                                                                                                                                                                 |
| Dixtal DX-3012        | Ad, Ped      | UTI                    | Sim           | Contínuo, Desacelerado | Curvas, Alças | BiLevel, PS-Vol Gar, MMV, PSV: <i>rise time</i> Et ajuste tempo (% fluxo), APRV                                                        | Capnógrafo, PO.1, PiMax                                                                                                                                                                          |
| <b>Tyco/Covidien</b>  |              |                        |               |                        |               |                                                                                                                                        |                                                                                                                                                                                                  |
| Puritan Bennett 840   | Ad, Ped      | UTI                    | Sim           | Contínuo, Desacelerado | Curvas, Alças | BiLevel, PSV: <i>rise time</i> Et ajuste tempo (% fluxo), PAV-Plus, compensação automática de tubo, APRV                               |                                                                                                                                                                                                  |

Ad - uso em adultos; Ped - uso em crianças (não neonatos); Neo - uso em neonatologia; UTI - uso apropriado para UTI; PSV - *pressure support ventilation mode*; Bipap - *bilevel positive air pressure*; VCV - *volume controlled ventilation mode*; PCV - *pressure controlled ventilation mode*; SIMV - *synchronized inspiratory mandatory ventilation*; CPAP - *continuous positive air pressure*; iVAPS - *intelligent volume-assured pressure support*; APRV - *airway pressure release ventilation*; PRVC - *pressure regulated volume controlled*; ASV - *adaptative support ventilation*; MMV - *minute mandatory ventilation*; PS - uso no pronto-socorro; VAPS - *volume assured pressure support ventilation mode*; Pimax - pressão inspiratória máxima; CRF - capacidade residual funcional; NAVA - neurally adjust ventilatory assist; PAV - *proportional assist ventilation*; APV - *adaptative pressure ventilation*; PS-Vol Gar - *pressure support (volume guarantee)*.

**Quadro 5** – Ventiladores modo-dedicados HFOV (adultos).

| Fabricante/Modelo   | Faixa etária |
|---------------------|--------------|
| Care Fusion         |              |
| SensorMedics 3100 B | Ad, Ped      |

HFOV - *high frequency oscillatory ventilation*; Ad - uso em adultos; Ped - uso em crianças (não neonatos).
