# Supplementary material for: Brazilian recommendations of mechanical ventilation 2013. Part I
Source: PubMed Central journal article supplement (PMC4201165; doi:10.1590/s1806-37132014000400002), 2014
Supplement: 1806-3713-jbpneu-40-04-00327-suppl01.pdf [file 1806-3713-jbpneu-40-04-00327-suppl01.pdf]

# Online Supplement

## Brazilian recommendations of mechanical ventilation 2013. Part 1

Recomendações brasileiras de ventilação mecânica 2013. Parte 1

Workgroup of the Brazilian Association of Intensive Care Medicine and the Brazilian Thoracic Society

**Chart 1** – Available ventilators for noninvasive ventilation.

| Manufacturer/ Model                                                                               | Context of use         | Available modes                                                                        | Special modes                                                                              | Observations                                                          |
|---------------------------------------------------------------------------------------------------|------------------------|----------------------------------------------------------------------------------------|--------------------------------------------------------------------------------------------|-----------------------------------------------------------------------|
| <b>Philips</b>                                                                                    |                        |                                                                                        |                                                                                            |                                                                       |
| BIPAP A30                                                                                         | Specific for NIV       | AVAPS<br>Auto-trak                                                                     | Oximetry coupling                                                                          | Memory card and trends can be coupled                                 |
| TRILOGY-100                                                                                       | NIV and IMV            | PSV, PCV and VCV<br>AVAPS                                                              | Leak compensation<br><i>Auto-trak</i><br>Heated humidification                             | Monitoring screen<br>6-8 hour battery                                 |
| <b>Dixtal</b>                                                                                     |                        |                                                                                        |                                                                                            |                                                                       |
| DX3012                                                                                            | NIV and IMV            | PSV, PCV, VCV, SIMV, CPAP                                                              | Leak compensation<br>Active and passive humidification                                     | Monitoring screen, volumetric capnography                             |
| <b>Philips respironics</b>                                                                        |                        |                                                                                        |                                                                                            |                                                                       |
| BIPAP-vision, focus and ST                                                                        | Specific for NIV       | BIPAP and CPAP                                                                         | Auto-trak<br>Leak compensation<br>Slope adjustment<br>FIO <sub>2</sub> control in vision   | Monitoring screen                                                     |
| <b>Resmed</b>                                                                                     |                        |                                                                                        |                                                                                            |                                                                       |
| Stellar                                                                                           | NIV and IMV            | PSV with automatic pressure adjustment<br>iVAPS                                        | FIO <sub>2</sub> control<br>Portable<br>Data <i>download</i>                               | Monitoring screen, preset values for diseases, mask adjustment        |
| <b>Covidien</b>                                                                                   |                        |                                                                                        |                                                                                            |                                                                       |
| Covidien 840                                                                                      | NIV module             | Spontaneous + PSV<br>A/C and SIMV                                                      | Slope and expiratory sensitivity can be adjusted in PSV                                    | Possible <i>back up</i> with manual ventilation and/or V <sub>f</sub> |
| <b>Servo</b>                                                                                      |                        |                                                                                        |                                                                                            |                                                                       |
| Servo I                                                                                           | NIV module             | Spontaneous and PSV                                                                    | FIO <sub>2</sub> control<br>Adjustment of slope and expiratory cycling                     | Monitoring screen                                                     |
| <b>Dräger</b>                                                                                     |                        |                                                                                        |                                                                                            |                                                                       |
| Ventilator Carina                                                                                 | Specific for NIV       | VC-SIMV Auto-Flow<br>PC-BIPAP<br>PC-AC<br>SPN-PS (VG)<br>SPN-CPAP<br>Apnea ventilation | 1-hour internal battery, 9-hour external battery<br>Automatic triggering and slope control | Monitoring screen and automatic leak compensation                     |
| EVITA XL                                                                                          | Special module for NIV | PSV                                                                                    | Automatic adjustments                                                                      | Monitoring screen                                                     |
| <b>GE</b>                                                                                         |                        |                                                                                        |                                                                                            |                                                                       |
| Engstrom Pro                                                                                      | VNI and VMI            | Multiple modes of ventilation                                                          | Internal battery                                                                           | Monitoring screen and automatic adjustments                           |
| <b>Alliance</b>                                                                                   |                        |                                                                                        |                                                                                            |                                                                       |
| Care fusion-VELA                                                                                  | Special module for NIV | PSV                                                                                    | 6-hour battery<br>Leak compensation                                                        | Monitoring screen                                                     |
| <b>Intermed</b>                                                                                   |                        |                                                                                        |                                                                                            |                                                                       |
| Care Fusion: IX-5                                                                                 | Special module for NIV | A/C, SIMV, CPAP, PSV                                                                   | Adjustment of inspiratory and expiratory sensitivity and rise time                         | Monitoring screen with up to 5 simultaneous curves                    |
| Care Fusion: Inter 7 plus                                                                         | Special module for NIV | A/C, SIMV, CPAP, PSV                                                                   | Adjustment of inspiratory and expiratory sensitivity and rise time                         | 3-hour internal battery                                               |
| <b>VIVO</b>                                                                                       |                        |                                                                                        |                                                                                            |                                                                       |
| VIVO 40 (pressure up to 40 cmH <sub>2</sub> O) and VIVO 30 (pressure up to 30 cmH <sub>2</sub> O) | Special module for NIV | PSV, PCV and CPAP                                                                      | Adjustment of inspiratory and expiratory sensitivity and rise time                         | External battery<br>Humidification system                             |

**Chart 1** - Continued...

| Manufacturer/ Model                               | Context of use         | Available modes | Special modes                         | Observations      |
|---------------------------------------------------|------------------------|-----------------|---------------------------------------|-------------------|
| <b>Breas</b>                                      |                        |                 |                                       |                   |
| I-sleep 20 (pressure up to 20 cmH <sub>2</sub> O) | Special module for NIV | CPAP            | Adjustable slope<br>Leak compensation | Heated humidifier |

BIPAP - bilevel positive air pressure; NIV - noninvasive ventilation; AVAPS - average volume assured pressure support; IMV - invasive mechanical ventilation; PSV - pressure support ventilation mode; VCV - volume controlled ventilation mode; PCV - pressure controlled ventilation mode; SIMV - synchronized inspiratory mandatory ventilation; CPAP - continuous positive air pressure; iVAPS - intelligent volume-assured pressure support; FIO<sub>2</sub> - fraction of inspired oxygen; Vf - respiratory rate; SPN-PS (VG) - spontaneous - pressure support (volume guarantee); SPN - spontaneous - pressure support; A/C - assist/control.

**Chart 2** - Basic ventilators (without curve monitoring).

| Manufacturer/Model                             | Age range | Context of use | Available modes                              | Flow (VCV)                 | Special modes                      | Observations                                            |
|------------------------------------------------|-----------|----------------|----------------------------------------------|----------------------------|------------------------------------|---------------------------------------------------------|
| <b>Air Liquide</b>                             |           |                |                                              |                            |                                    |                                                         |
| Taema Osiris                                   | Ad, Ped   | Transport      | A-C (VCV)                                    | Continuous                 | ---                                | ---                                                     |
| <b>Bio-Vent</b>                                |           |                |                                              |                            |                                    |                                                         |
| CrossVent CV-3 / CV-4                          | Ad, Ped   | ICU, Transport | A-C (VCV), SIMV, CPAP/ spontaneous, PSV      | Continuous                 | ---                                | ---                                                     |
| <b>Care Fusion</b>                             |           |                |                                              |                            |                                    |                                                         |
| Omni-Tech Omni-Vent                            | Ad, Ped   | Transport      | A-C (VCV)                                    |                            | ---                                | Can be used in MRI<br>Allows for hyperbaric ventilation |
| Allied EPV 200                                 | Ad        | Transport      | A-C (VCV)                                    | Continuous                 | ---                                | ---                                                     |
| Allied Life Support Autovent 2000, 3000 & 4000 | Ad        | Transport      | A-C (VCV), CPAP/ spontaneous                 | Continuous                 | ---                                | ---                                                     |
| <b>Drager</b>                                  |           |                |                                              |                            |                                    |                                                         |
| Oxylog 2000 Plus                               | Ad        | Transport      | A-C (VCV), SIMV, CPAP/ spontaneous           | Continuous                 | ---                                | ---                                                     |
| Oxylog 3000                                    | Ad, Ped   | Transport      | A-C (VCV), PCV, SIMV, CPAP/ spontaneous, PSV | Continuous                 | ---                                | ---                                                     |
| Oxylog 3000                                    | Ad, Ped   | Transport      | A-C (VCV), PCV, SIMV, CPAP/ spontaneous, PSV | Continuous                 | ---                                | Capnometry.<br>Optional: <i>autoflow</i>                |
| <b>GE</b>                                      |           |                |                                              |                            |                                    |                                                         |
| Bi-Level 40                                    | Ad, Ped   | Transport      | A-C (VCV), PCV, SIMV, CPAP/ spontaneous, PSV | Continuous                 | ---                                | ---                                                     |
| <b>K. Takaoka</b>                              |           |                |                                              |                            |                                    |                                                         |
| Mini-ventil 600                                | Ad        | Transport      | A-C (VCV)                                    | Continuous                 | ---                                | ---                                                     |
| MicroTak 920                                   | Ad, Ped   | Transport      | A-C (VCV), SIMV, CPAP/ spontaneous           | Continuous                 | ---                                | ---                                                     |
| <b>Leistung</b>                                |           |                |                                              |                            |                                    |                                                         |
| PR 4D-02                                       | Ad, Ped   | Transport      | A-C (VCV)                                    | Continuous                 | ---                                | Time-cycled                                             |
| <b>Res Med</b>                                 |           |                |                                              |                            |                                    |                                                         |
| VS III                                         | Ad, Ped   | ICU, NIV       | A-C (VCV), PCV, SIMV, CPAP/ spontaneous, PSV | Continuous                 | ---                                | ---                                                     |
| <b>Tyco / Covidien</b>                         |           |                |                                              |                            |                                    |                                                         |
| Newport HT 70                                  | Ad, Ped   | Transport      | A-C (VCV), PCV, SIMV, CPAP/ spontaneous, PSV | Continuous<br>Decelerating | Rise time<br>% expiratory time-PSV | ---                                                     |
| <b>Vent-Logos</b>                              |           |                |                                              |                            |                                    |                                                         |
| VLP 2000 - E                                   | Ad        | Transport      | A-C (VCV)                                    | Continuous                 | ---                                | ---                                                     |
| VLP 4000 - P                                   | Ad        | Transport      | A-C (VCV)                                    | Continuous                 | ---                                | ---                                                     |

Ad - use in adults; Ped - use in children (non-newborn); A-C - assist control; VCV - volume controlled ventilation mode; SIMV - synchronized inspiratory mandatory ventilation; CPAP - continuous positive air pressure; PCV - pressure controlled ventilation mode; PSV - pressure support ventilation mode; MRI - magnetic resonance imaging; transport - use for transportation of patients under invasive mechanical ventilation; ICU - appropriate for use in intensive care unit; NIV - use for noninvasive ventilation.

**Chart 3** – Ventilators with basic resources and with curves.

| Manufacturer/ Model   | Age range | Context of use | Available modes                             | Flow (VCV)               | Monitoring    | Special modes                                                   | Observation                                                                                |
|-----------------------|-----------|----------------|---------------------------------------------|--------------------------|---------------|-----------------------------------------------------------------|--------------------------------------------------------------------------------------------|
| <b>Air Liquide</b>    |           |                |                                             |                          |               |                                                                 |                                                                                            |
| Extend XT             | Ad, Neo   | ICU            | A-C (VCV), PCV, SIMV, CPAP/spontaneous, PSV | Continuous, decelerating | Curves, loops | - - -                                                           | Capnography                                                                                |
| <b>Care Fusion</b>    |           |                |                                             |                          |               |                                                                 |                                                                                            |
| Intermed Inter-5 Plus | Ad, Ped   | ICU            | A-C (VCV), PCV, SIMV, CPAP/spontaneous, PSV | Continuous, decelerating | Curves        | - - -                                                           | Separate monitor                                                                           |
| <b>Dräger</b>         |           |                |                                             |                          |               |                                                                 |                                                                                            |
| Savina 300            | Ad, Ped   | ICU            | A-C (VCV), PCV, SIMV, CPAP/spontaneous, PSV | Continuous, decelerating | Curves        | BiLevel                                                         | <i>Auto-Flow</i>                                                                           |
| <b>GE</b>             |           |                |                                             |                          |               |                                                                 |                                                                                            |
| Ventil Pulmonar 101   | Ad, Ped   | ICU, home      | A-C (VCV), PCV, SIMV, CPAP/spontaneous, PSV | Continuous, decelerating | Curves        | PRVC, volume guaranteed                                         | iVent MRI: can be used in MRI                                                              |
| <b>Hamilton</b>       |           |                |                                             |                          |               |                                                                 |                                                                                            |
| Galileo Gold          | Ad, Ped   | ICU            | A-C (VCV), PCV, SIMV, CPAP/spontaneous, PSV | Continuous, decelerating | Curves, loops | ASV, APRV, automatic tube compensation                          | Automatic P-V curve, P0.1                                                                  |
| Raphael Color         | Ad, Ped   | ICU, ER        | A-C (VCV), PCV, SIMV, CPAP/spontaneous, PSV | Continuous, decelerating | Curves, loops | ASV, APRV, automatic tube compensation                          | - - -                                                                                      |
| T-1                   | Ad, Ped   | Transport      | A-C (VCV), PCV, SIMV, CPAP/spontaneous, PSV | Continuous, decelerating | Curves        | ASV                                                             | Automatic P-V curve<br>Capnometry<br>Barometric pressure compensation (air transportation) |
| MR-1                  | Ad, Ped   | Transport      | A-C (VCV), PCV, SIMV, CPAP/spontaneous, PSV | Continuous, decelerating | Curves        | ASV                                                             | For MRI<br>"Extra" monitor                                                                 |
| <b>K-Takaoka</b>      |           |                |                                             |                          |               |                                                                 |                                                                                            |
| Smart                 | Ad, Neo   | ICU, ER        | A-C (VCV), PCV, SIMV, CPAP/spontaneous, PSV | Continuous, decelerating | Curves, loops | BiLevel, orotracheal tube compensation                          | P0.1<br>PiMax                                                                              |
| Carmel                | Ad, Neo   | ICU            | A-C (VCV), PCV, SIMV, CPAP/spontaneous, PSV | Continuous, decelerating | Curves        | PSV: RiseTime & time adjustment (% flow), PCV volume guaranteed | Capnometry                                                                                 |
| <b>Leistung</b>       |           |                |                                             |                          |               |                                                                 |                                                                                            |
| Luft 1-g              | Ad, Ped   | ICU, ER        | A-C (VCV), PCV, SIMV, CPAP/spontaneous, PSV | Continuous, decelerating | Curves        | - - -                                                           | - - -                                                                                      |
| Luft 2-g              | Ad, Ped   | ICU            | A-C (VCV), PCV, SIMV, CPAP/spontaneous, PSV | Continuous, decelerating | Curves, loops | MMV, BiLevel, PSV volume guaranteed, APRV                       | - - -                                                                                      |
| PR - 4g               | Ad, Ped   | Transport      | A-C (VCV), PCV, SIMV, CPAP/spontaneous, PSV | Continuous, decelerating | Curves        | - - -                                                           | - - -                                                                                      |
| <b>Magnamed</b>       |           |                |                                             |                          |               |                                                                 |                                                                                            |
| Fleximag              | Ad, Neo   | ICU, ER        | A-C (VCV), PCV, SIMV, CPAP/spontaneous, PSV | Continuous, decelerating | Curves        | BiLevel, PSV: rise time                                         | Capnography (optional)                                                                     |
| Oxymag                | Ad, Neo   | Transport      | A-C (VCV), PCV, SIMV, CPAP/spontaneous, PSV | Continuous, decelerating | Curves        | BiLevel, APRV                                                   | Capnography (optional)                                                                     |
| <b>Neumovent</b>      |           |                |                                             |                          |               |                                                                 |                                                                                            |
| GraphNet T5           | Ad, Ped   | ICU, ER        | A-C (VCV), PCV, SIMV, CPAP/spontaneous, PSV | Continuous, decelerating | Curves        | - - -                                                           | - - -                                                                                      |
| <b>Tyco/Covidien</b>  |           |                |                                             |                          |               |                                                                 |                                                                                            |
| Newport e360          | Ad        | ICU, ER        | A-C (VCV), PCV, SIMV, CPAP/spontaneous, PSV | Continuous, decelerating | Curves, loops | BiLevel, PSV: rise time & time adjustment (% flow), APRV        | - - -                                                                                      |

Ad - use in adults; Ped - use in children (non-newborn); Neo - use in neonatology; ICU - appropriate for use in ICU; PSV - pressure support ventilation mode; VCV - volume controlled ventilation mode; PCV - pressure controlled ventilation mode; SIMV - synchronized inspiratory mandatory ventilation; CPAP - continuous positive air pressure; APRV - airway pressure release ventilation; PRVC - pressure regulated volume controlled; ASV - adaptive support ventilation; MMV - minute mandatory ventilation; ER - use in emergency room.

**Chart 4** – Ventilators with curve monitoring and advanced resources.

| Manufacturer/ Model   | Age range | Context of use | Basic modes | Flow (VCV)               | Monitoring    | Special modes                                                                                                             | Observations                                                 |
|-----------------------|-----------|----------------|-------------|--------------------------|---------------|---------------------------------------------------------------------------------------------------------------------------|--------------------------------------------------------------|
| <b>Air Liquide</b>    |           |                |             |                          |               |                                                                                                                           |                                                              |
| Monnal T-75           | Ad, Neo   | ICU            | Yes         | Continuous, decelerating | Curves, loops | BiLevel CPAP, PRVC                                                                                                        | Capnography                                                  |
| <b>Care Fusion</b>    |           |                |             |                          |               |                                                                                                                           |                                                              |
| Viasys Vela           | Ad, Ped   | ICU            | Yes         | Continuous, decelerating | Curves, loops | PSV: RiseTime & time adjustment (% flow), PRVC, APRV                                                                      | Capnography                                                  |
| Viasys Avea           | Ad, Neo   | ICU            | Yes         | Continuous, decelerating | Curves, loops | V-PSV, PSV: RiseTime & time adjustment (% flow), Vsync, PRVC, AAC (tube compensation)                                     | Capnography<br>Measures P0.1, Pimax, WOB (esophageal)        |
| Intermed i X5         | Ad, Neo   | ICU            | Yes         | Continuous, decelerating | Curves, loops | PSV: RiseTime & time adjustment (% flow), TGI, tube compensation                                                          | Measures P0.1                                                |
| Intermed Inter-7 Plus | Ad, Neo   | ICU            | Yes         | Continuous, decelerating | Curves, loops | PSV: RiseTime & time adjustment (% flow), VAPS, BiLevel, TGI, APRV (BiPEEP)                                               | Measures P0.1                                                |
| <b>Drager</b>         |           |                |             |                          |               |                                                                                                                           |                                                              |
| Evita 4               | Ad, Ped   | ICU            | Yes         | Continuous, decelerating | Curves, loops | MMV, Auto-Flow, APRV, PPS (optional), ATC – tube compensation                                                             | Capnography, PiMax, Vd/Vt                                    |
| Evita XL              | Ad, Neo   | ICU            | Yes         | Continuous, decelerating | Curves, loops | Auto-Flow, automatic tube compensation, Smart Care Variable SP, BiLevel, PC-APRV, Recruitment maneuver, Low flow maneuver | Capnography, oximetry, Lung protection package (optional)    |
| <b>GE</b>             |           |                |             |                          |               |                                                                                                                           |                                                              |
| Engstron Carestation  | Ad, Neo   | ICU            | Yes         | Continuous, decelerating | Curves, loops | BiLevel<br>PSV: RiseTime & time adjustment (% flow), Automatic tube compensation, APRV, PC-volume guaranteed              | P0.1, PiMax, Measures FRC, indirect calorimetry              |
| Engstron Pro          | Ad, Neo   | ICU            | Yes         | Continuous, decelerating | Curves, loops | BiLevel,<br>PSV: RiseTime & time adjustment (% flow), automatic orotracheal tube compensation, APRV, PC-volume guaranteed | P0.1                                                         |
| <b>Hamilton</b>       |           |                |             |                          |               |                                                                                                                           |                                                              |
| C-3                   | Ad, Ped   | ICU, ER        | Yes         | Continuous, decelerating | Curves        | ASV, APRV                                                                                                                 | Volumetric capnometry (optional),                            |
| C-2                   | Ad, Ped   | ICU, ER        | Yes         | Continuous, decelerating | Curves, loops | ASV, APV, Tube compensation, APRV                                                                                         | Automatic P-V curve, Volumetric capnometry (optional),       |
| S-1                   | Ad, Ped   | ICU            | Yes         | Continuous, decelerating | Curves, loops | ASV, APRV                                                                                                                 | Automatic P-V curve, capnography,                            |
| G-5                   | Ad, Neo   | ICU            | Yes         | Continuous, decelerating | Curves, loops | ASV, BiLevel, APRV, APV                                                                                                   | Allows heliox (optional), Volumetric capnography (optional), |
| <b>K Takaoka</b>      |           |                |             |                          |               |                                                                                                                           |                                                              |
| Color                 | Ad, Neo   | ICU            | Yes         | Continuous, decelerating | Curves        | MMV, PSV-volume guaranteed, BiLevel, tube compensation                                                                    | P0.1, PiMax, Capnometry                                      |
| <b>Maquet Getinge</b> |           |                |             |                          |               |                                                                                                                           |                                                              |
| Servo-i               | Ad, Ped   | ICU            | Yes         | Continuous, decelerating | Curves, loops | NAVA (optional), AutoMode, BiLevel, PSV: RiseTime & time adjustment (% flow), PRVC, APRV                                  | Capnography, P0.1, WOB ( <i>in-line</i> )                    |

Chart 4 - Continued...

| Manufacturer/ Model  | Age range | Context of use    | Basic modes | Flow (VCV)               | Monitoring    | Special modes                                                                                                          | Observations                                                                                                                                                                  |
|----------------------|-----------|-------------------|-------------|--------------------------|---------------|------------------------------------------------------------------------------------------------------------------------|-------------------------------------------------------------------------------------------------------------------------------------------------------------------------------|
| Servo-S              | Ad, Ped   | ICU               | Yes         | Continuous, decelerating | Curves, loops | BiLevel, PSV: RiseTime & time adjustment (% flow), PRVC, APRV                                                          | PO.1                                                                                                                                                                          |
| <b>Mindray</b>       |           |                   |             |                          |               |                                                                                                                        |                                                                                                                                                                               |
| Synovent E3          | Ad, Ped   | Hospital, ICU, ER | Yes         | Continuous, decelerating | Curves, loops | Bilevel, PSV, optional automatic expiratory trigger control, rise time, time adjustment, tube compensation             | Capnography, PO.1, WOB, PiMax, enables connectivity with the hospital system (Bnelink/HL7)                                                                                    |
| Synovent E5          | Ad, Ped   | ICU               | Yes         | Continuous, decelerating | Curves, loops | PRVC, APRV, Bilevel, PSV, optional automatic expiratory trigger control, rise time, time adjustment, tube compensation | Capnography, PO.1, WOB, PiMax, low flow maneuver, enables connectivity with the hospital system (Bnelink/HL7), displays 4 simultaneous curves (P/T, V/T, F/T and capnography) |
| <b>Neumovent</b>     |           |                   |             |                          |               |                                                                                                                        |                                                                                                                                                                               |
| GraphNet Advance     | Ad, Neo   | ICU               | Yes         | Continuous, decelerating | Curves, loops | PRVC, APRV                                                                                                             | Capnography                                                                                                                                                                   |
| <b>Philips</b>       |           |                   |             |                          |               |                                                                                                                        |                                                                                                                                                                               |
| Dixtal DX-3012 Plus  | Ad, Ped   | ICU               | Yes         | Continuous, decelerating | Curves, loops | BiLevel, PS-volume guaranteed, MMV, PSV: rise time & time adjustment (% flow), APRV                                    | PO.1, Capnography                                                                                                                                                             |
| Dixtal DX-3012       | Ad, Ped   | ICU               | Yes         | Continuous, decelerating | Curves, loops | BiLevel, PS-Vol Gar, MMV, PSV: rise time & time adjustment (% flow), APRV                                              | Capnography, PO.1, PiMax                                                                                                                                                      |
| <b>Tyco/Covidien</b> |           |                   |             |                          |               |                                                                                                                        |                                                                                                                                                                               |
| Puritan Bennett 840  | Ad, Ped   | ICU               | Yes         | Continuous, decelerating | Curves, loops | BiLevel, PSV: rise time & time adjustment (% flow), PAV-Plus, automatic tube compensation, APRV                        |                                                                                                                                                                               |

Ad - use in adults; Ped - use in children (non-newborn); Neo - use in neonatology; ICU - appropriate for use in ICU; PSV - pressure support ventilation mode; Bipap - bilevel positive air pressure; VCV - volume controlled ventilation mode; PCV - pressure controlled ventilation mode; SIMV - synchronized inspiratory mandatory ventilation; CPAP - continuous positive air pressure; iVAPS - intelligent volume-assured pressure support; APRV - airway pressure release ventilation; PRVC - pressure regulated volume controlled; ASV - adaptive support ventilation; MMV - minute mandatory ventilation; ER - use in emergency room; VAPS - volume assured pressure support ventilation mode; Pimax - maximal inspiratory pressure; FRC - functional residual capacity; NAVA - neurally adjust ventilatory assist; PAV - proportional assist ventilation; APV - adaptive pressure ventilation; PS - pressure support.

Chart 5 - Mode-dedicated ventilators HFOV (adults).

| Manufacturer/Model  | Age range |
|---------------------|-----------|
| <b>Care Fusion</b>  |           |
| SensorMedics 3100 B | Ad, Ped   |

HFOV - high frequency oscillatory ventilation; Ad - use in adults; Ped - use in children (non-newborn).
